# Supplementary material for: Engineered MgO nanoparticles for cartilage-bone synergistic therapy
Source: PubMed Central journal article supplement — Sci Adv. 2024 Mar 8;10(10):eadk6084. doi: 10.1126/sciadv.adk6084 (PMC10923500; doi:10.1126/sciadv.adk6084), 2024-03-08
Supplement: sciadv.adk6084_sm.v1.pdf [file sciadv.adk6084_sm.v1.pdf]

Supplementary Materials for  
**Engineered MgO nanoparticles for cartilage-bone synergistic  
therapy**

Liming Zheng *et al.*

Corresponding author: Yifeng Zhang, zhangyf3@shanghaitech.edu.cn; Hui Wei,  
weihui@nju.edu.cn; Qing Jiang, qingj@nju.edu.cn

*Sci. Adv.* **10**, eadk6084 (2024)  
DOI: 10.1126/sciadv.adk6084

**This PDF file includes:**

Figs. S1 to S11  
Tables S1 to S5

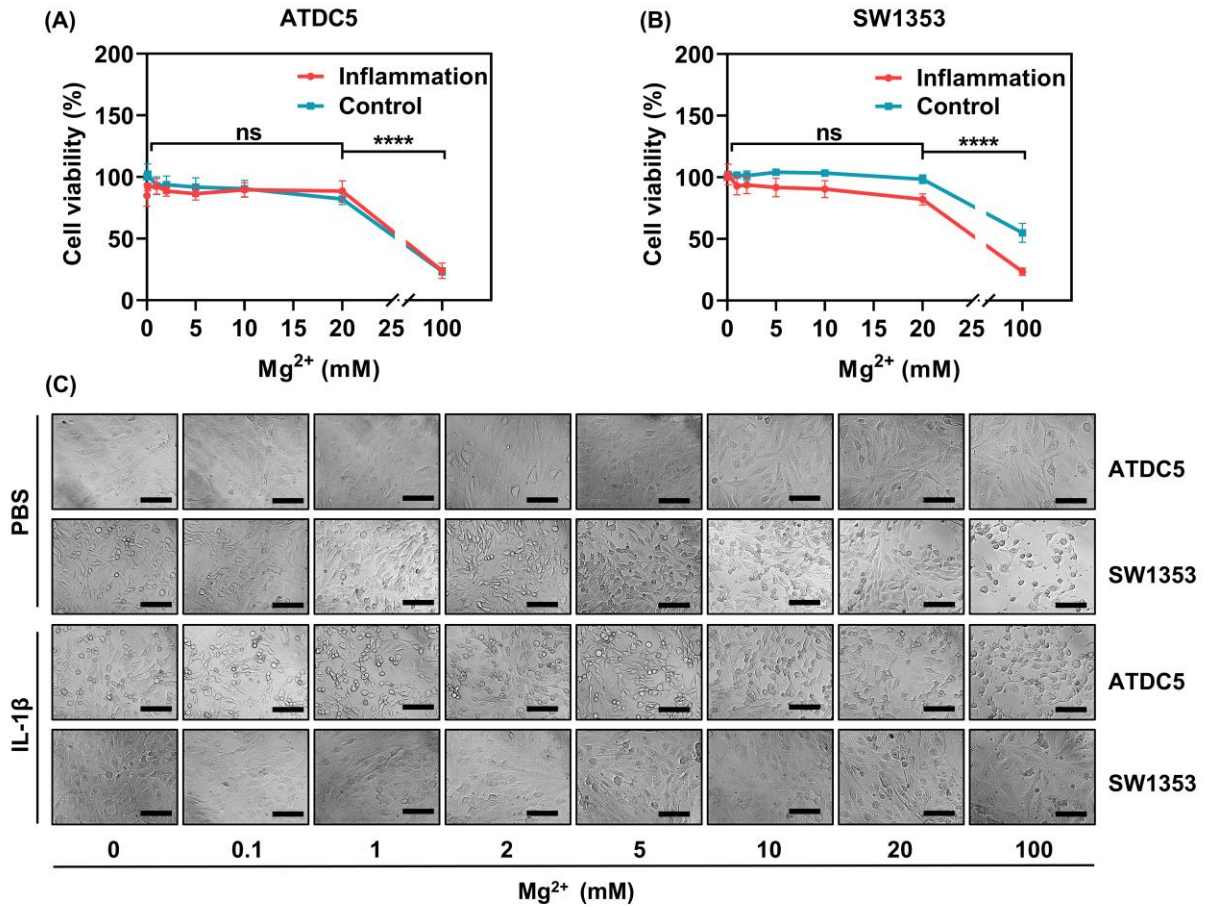

**Fig. S1. Cell viability of Mg<sup>2+</sup> in different kinds of cell lines.**

Cell viability of ATDC5 (A) and SW1353 (B) cells after treatment with gradient concentrations of Mg<sup>2+</sup> with/without inflammatory stimulation. (C) Representative microscopy images of ATDC5 and SW1353 cells after treatment with gradient concentrations of Mg<sup>2+</sup> with/without inflammatory stimulation.

Notes: Scale Bar: 100 μm. All data are the mean ± s.d. Statistical differences between groups were determined by one-way ANOVA analysis. \*\*\*\*P<0.0001, ns P>0.05. n=3.

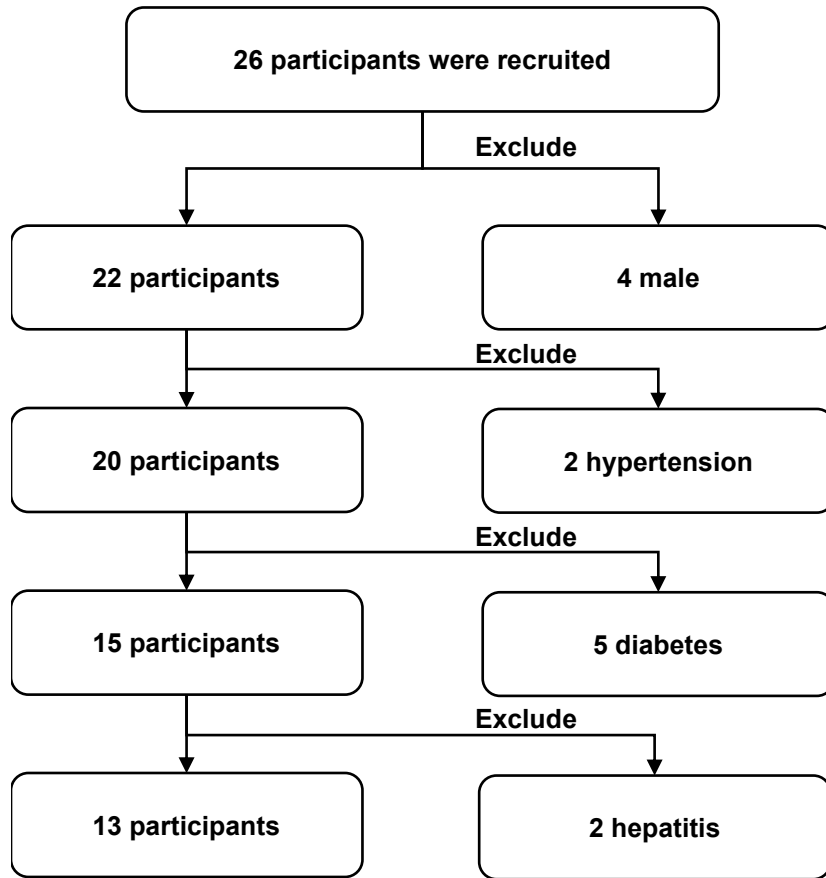

**Fig. S2. Flow chart of the inclusion and exclusion criteria.**

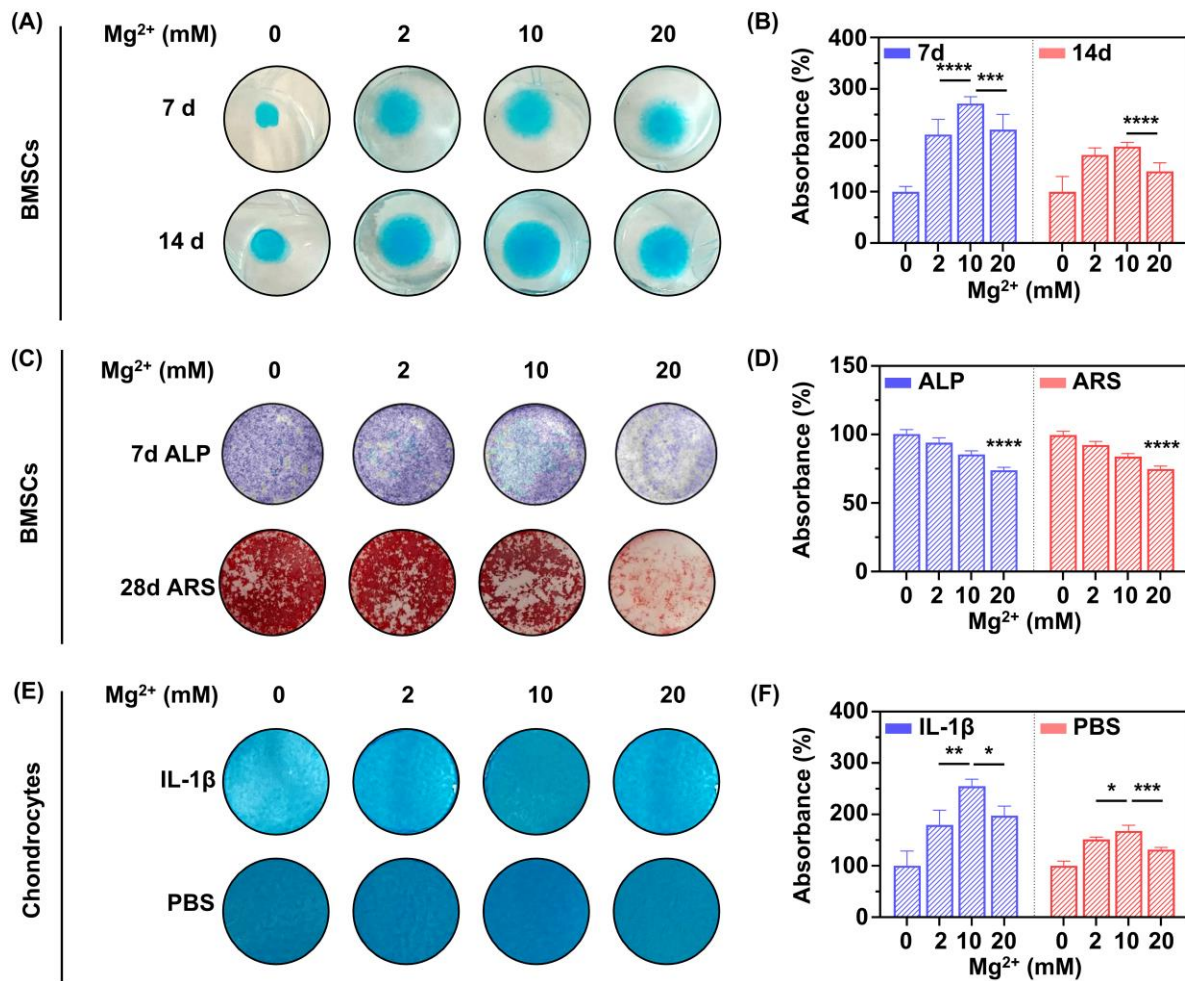

**Fig. S3. Gradient Mg<sup>2+</sup> regulated chondrogenic and osteogenic differentiation of BMSCs and protected inflammatory damaged chondrocytes *in vitro*.**

Alcian blue staining of BMSCs treated with gradient Mg<sup>2+</sup> (A) and quantitative results (B). ALP and ARS staining of BMSCs treated with gradient Mg<sup>2+</sup> (C) and quantitative results (D). Alcian blue staining of chondrocytes treated with gradient Mg<sup>2+</sup> with/without supplementation with 10 ng/mL IL-1β (E) and quantitative results (F).

Notes: All data are the mean ± s.d. Statistical differences between groups were determined by one-way ANOVA analysis. \*P<0.05, \*\*P<0.01, \*\*\*P<0.001, \*\*\*\*P<0.0001. n=3.

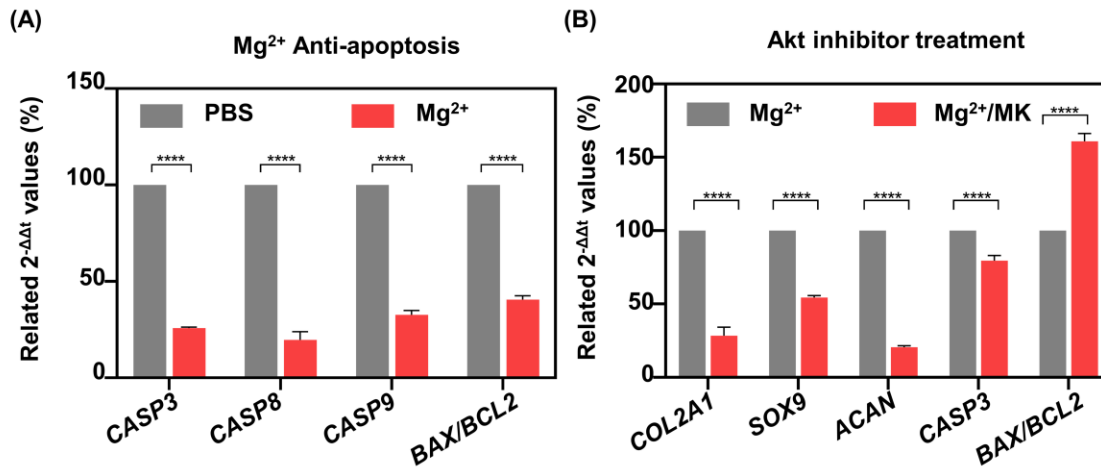

**Fig. S4. Mg<sup>2+</sup> inhibited apoptosis of chondrocytes via phosphorylation of Akt.**

(A) Relative mRNA levels of apoptosis-related genes (*CASP3*, *CASP8*, *CASP9*, and *BAX/BCL2*) in SW1353 cells after treatment with 10 mM Mg<sup>2+</sup> for 24 hours. (B) Relative mRNA levels (*COL2A1*, *SOX9*, *ACAN*, *CASP3*, *BAX/BCL2*) of apoptosis-related genes in SW1353 cells after treatment with 10 mM Mg<sup>2+</sup> and MK2206 for 24 hours.

Notes: All data are the mean  $\pm$  s.d. Statistical differences between groups were determined by t test. \*\*\*\*P<0.0001. n = 4.

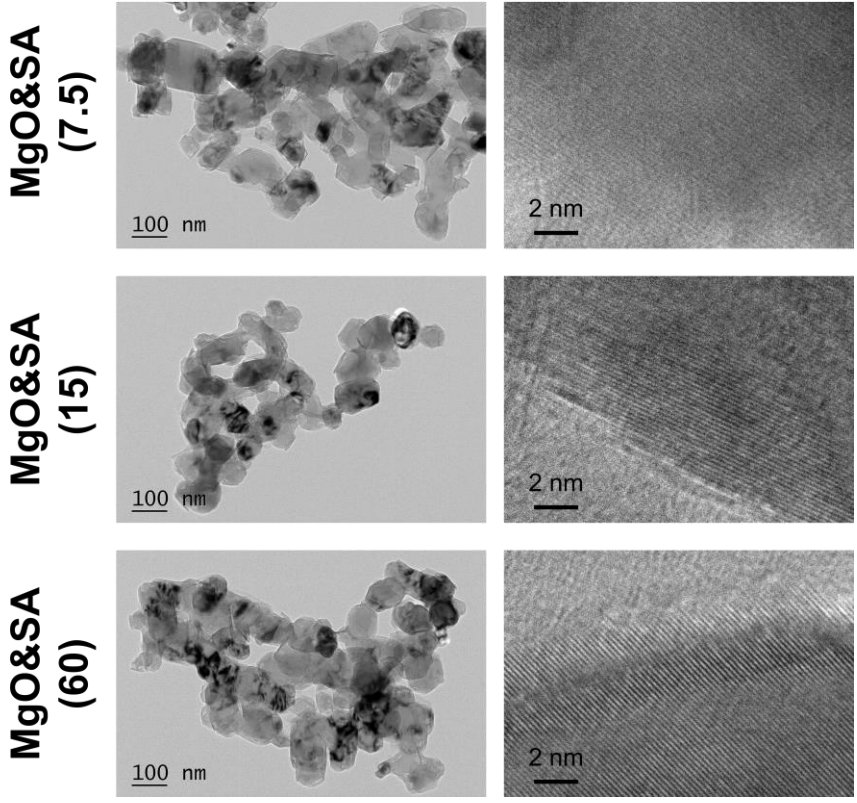

Fig. S5. TEM images of MgO nanoparticles modified with different concentrations of SA.

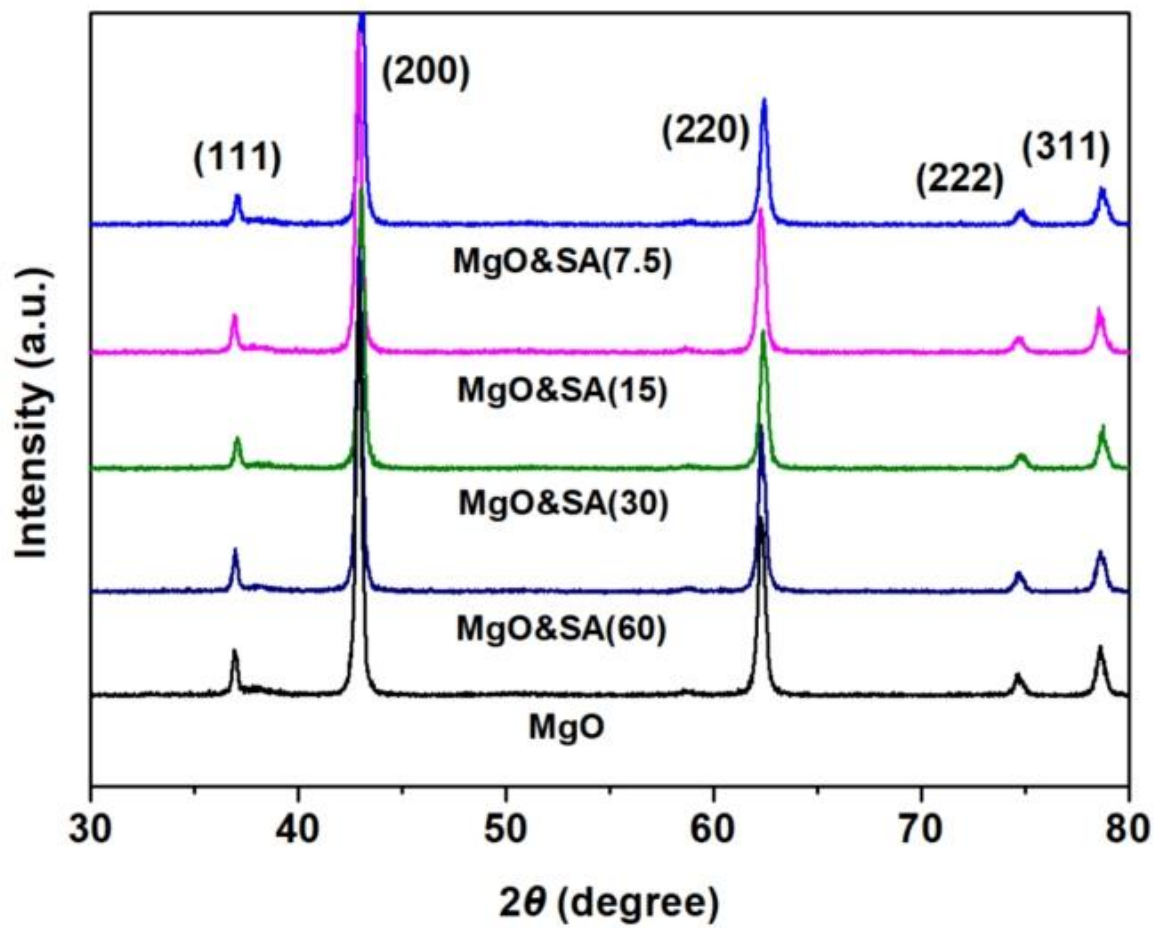

**Fig. S6.** XRD patterns of MgO nanoparticles modified with different concentrations of SA.

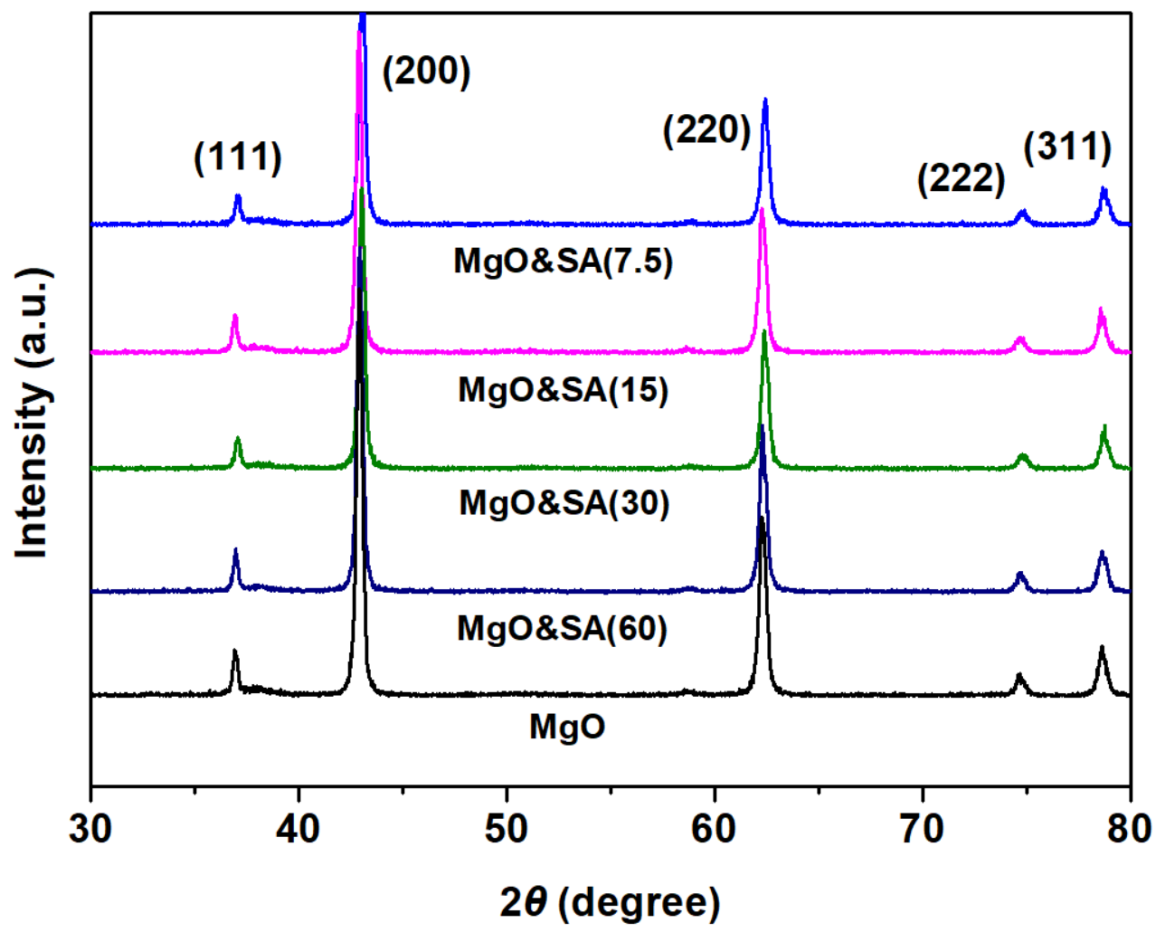

**Fig. S7.** FTIR spectra of MgO nanoparticles modified with different concentrations of SA.



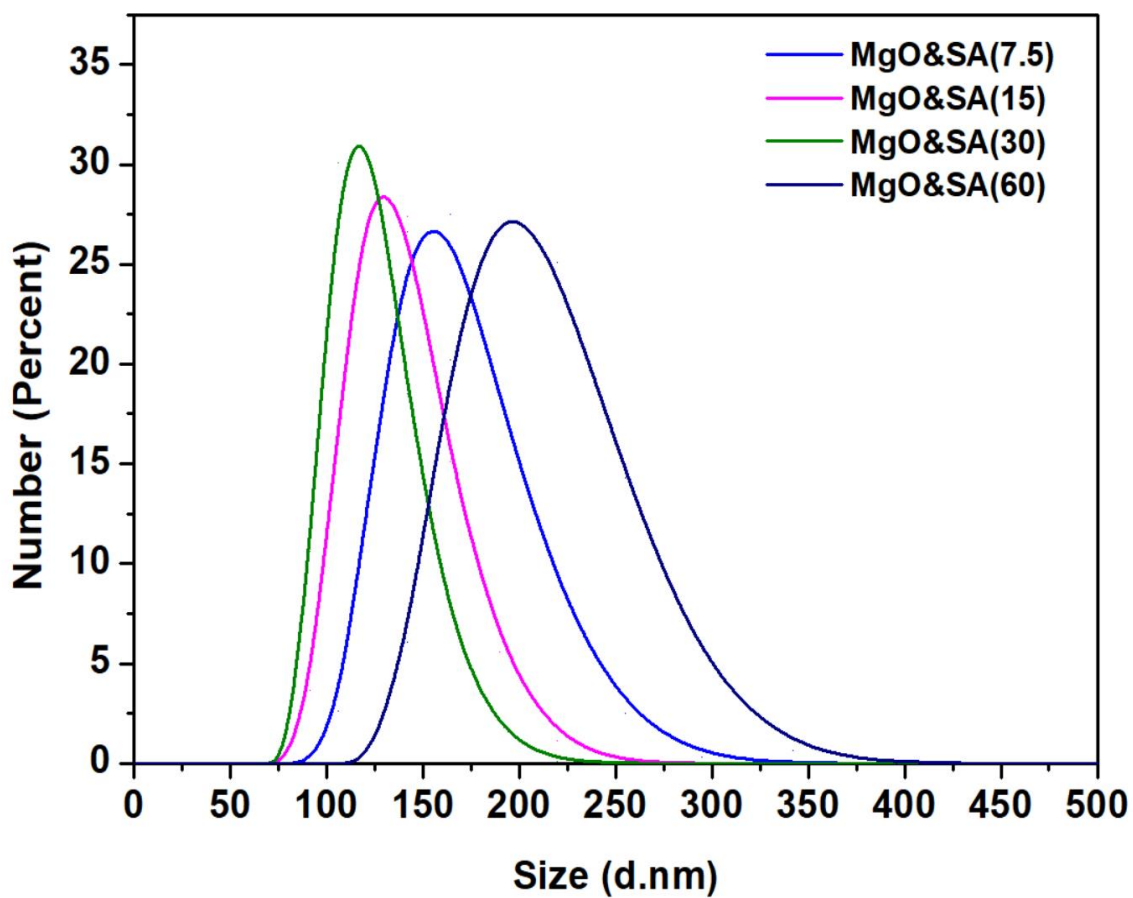

**Fig. S8.** DLS results of MgO nanoparticles modified with different concentrations of SA in DCM.

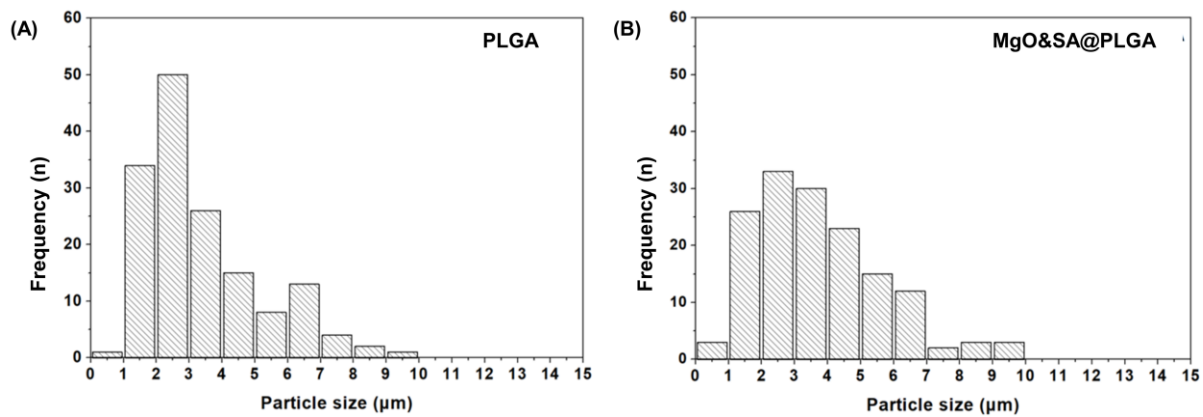

**Fig. S9.** Size distribution of PLGA (A) and MgO&SA@PLGA microspheres (B).

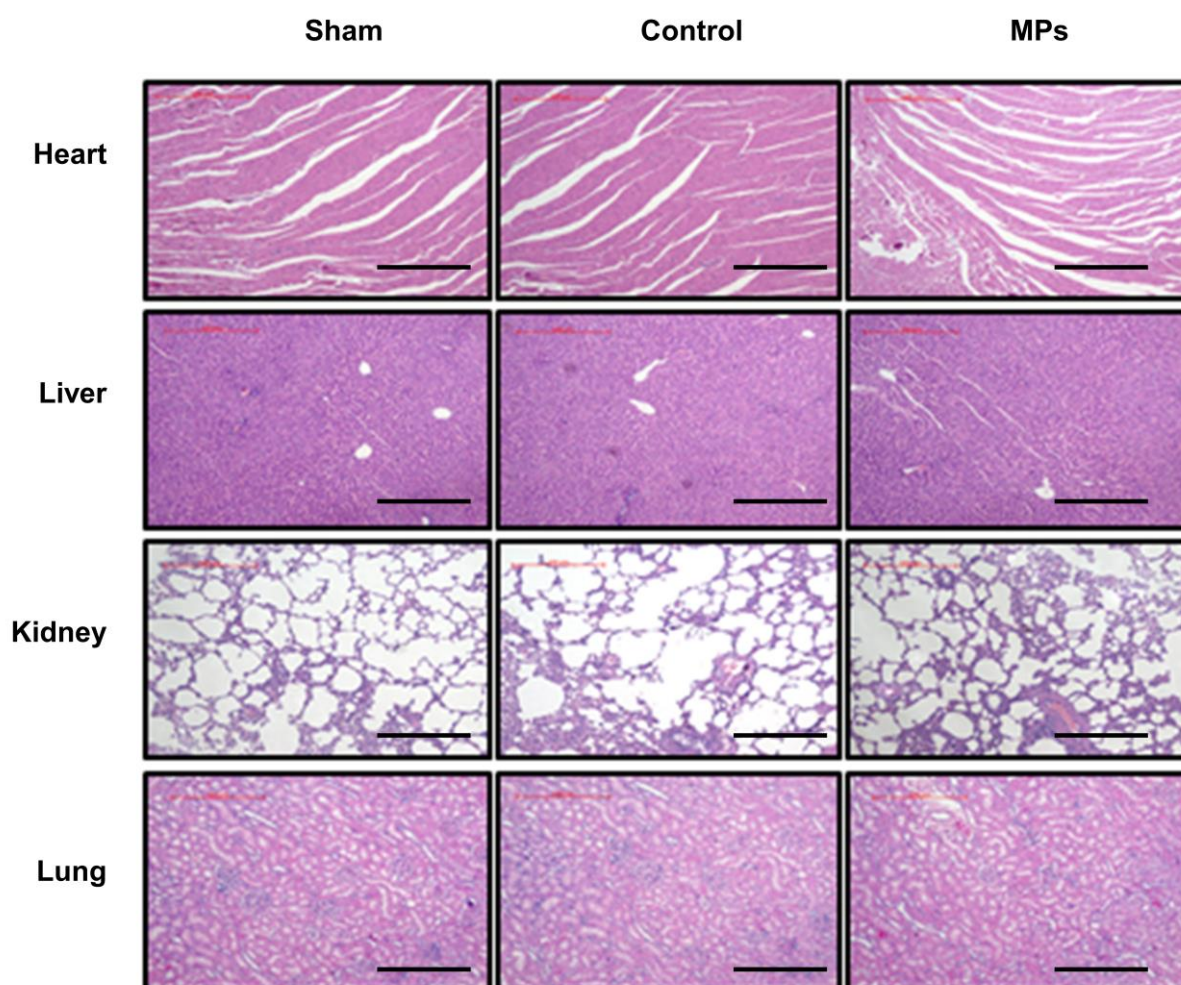

**Fig. S10. Mg<sup>2+</sup>-releasing MPs showed no toxicity *in vivo*.**

H&E staining of sections of heart, liver, kidney, and lung of rats conditionally treated for 4 weeks.

Scale bar: 100  $\mu$ m.

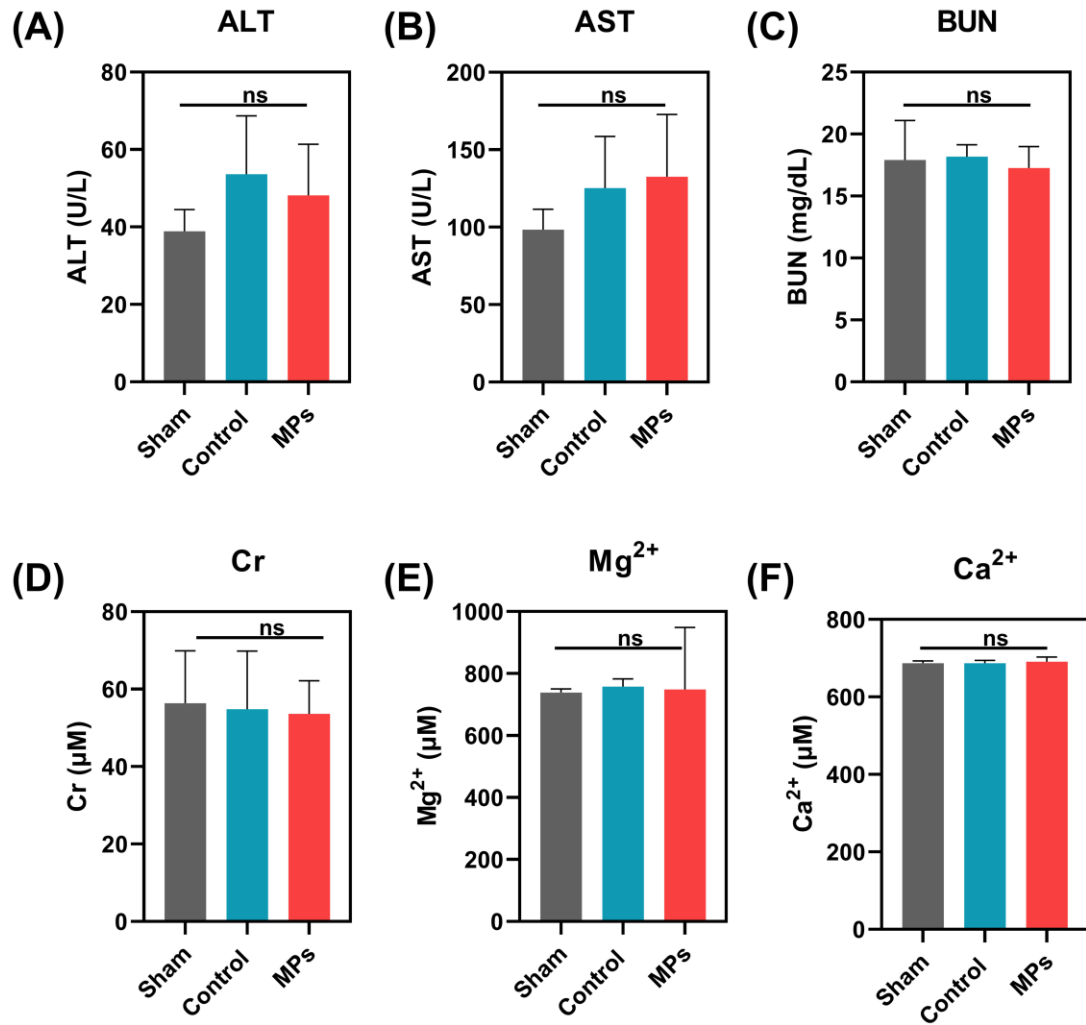

**Fig. S11. Mg<sup>2+</sup>-releasing MPs showed no toxicity *in vivo*.**

Serum indexes, including ALT (A), AST (B), BUN (C), Cr (D), Mg<sup>2+</sup> (E), and Ca<sup>2+</sup> (F), were tested.

**Note:** All data are the mean ± s.d. Statistical differences between groups were determined by one-way ANOVA analysis. ns, P>0.05. n=6.



**Table S2. Bone morphological parameters of subchondral bone at 2 and 4 weeks after the OA model was established.**

| Indexes                     | Sham          | Control      | MPs           | P-value       |
|-----------------------------|---------------|--------------|---------------|---------------|
| BMC (mg/cm <sup>3</sup> )   | 571.3 ± 149.1 | 421.1 ± 35.7 | 512.4 ± 39.0  | <b>0.0048</b> |
| BMD (mg/cm <sup>3</sup> )   | 929.1 ± 37.3  | 953.1 ± 18.7 | 957.2 ± 21.9  | 0.7596        |
| BV/TV (A.U.)                | 0.61 ± 0.19   | 0.43 ± 0.05  | 0.53 ± 0.05   | <b>0.0099</b> |
| BS/BV (1/mm)                | 14.78 ± 4.79  | 19.32 ± 1.95 | 16.50 ± 1.75  | <b>0.0423</b> |
| Conn.D (1/mm <sup>3</sup> ) | 84.46 ± 29.21 | 80.92 ± 20.8 | 93.44 ± 14.89 | 0.3054        |
| SMI (A.U.)                  | -3.41 ± 3.89  | -0.38 ± 0.58 | -1.16 ± 0.78  | 0.1113        |
| Tb.N (1/mm)                 | 4.05 ± 0.40   | 3.96 ± 0.36  | 4.20 ± 0.36   | 0.3258        |
| Tb.Th (µm)                  | 0.15 ± 0.06   | 0.10 ± 0.01  | 0.12 ± 0.01   | <b>0.0344</b> |
| Tb.Sp (µm)                  | 0.10 ± 0.05   | 0.15 ± 0.02  | 0.12 ± 0.02   | <b>0.0267</b> |

Note: P value showed the difference between Control and MPs groups and the P value was bold when P < 0.05. A.U. Arbitrary Units.

**Table S3. Culture medium used to induce differentiation and indexes evaluated in different cells.**

| Cells                                | Medium for differentiation                                                                                  | Indexes evaluated                                                                                 |
|--------------------------------------|-------------------------------------------------------------------------------------------------------------|---------------------------------------------------------------------------------------------------|
| ATDC5                                | BM + ITS                                                                                                    | Expression of Sox9 and Col2 $\alpha$ 1 separately at 7 and 14 days.                               |
| BMSCs (chondrogenic differentiation) | BM + Insulin (6.25 $\mu$ g/mL) + TGF- $\beta$ 1 (10 ng/mL) + ascorbic acid (50 $\mu$ g/mL)                  | Alcian blue staining at 7 and 14 days.                                                            |
| hBMSCs (osteogenic differentiation)  | BM + $\beta$ -sodium glycerophosphate (10 mM) + dexamethasone (0.1 $\mu$ M) + ascorbic acid (50 $\mu$ g/mL) | ALP and ARS staining at 7 and 28 days. Expression of osteogenic related genes at specific period. |
| Mice monocytes                       | BM + MCSF (30 ng/mL) + RANKL (50 ng/mL)                                                                     | The number and area of osteoclasts at 7 days.                                                     |

**Table S4. List of sequences of primers used in this study.**

| Gene          | Primer sequences (5'-3')     | Annealing temperature | Source | Species |
|---------------|------------------------------|-----------------------|--------|---------|
| <i>ACTB</i>   | F: TCACCCACACTGTGCCCATCTACGA | 64.1                  | Thermo | Human   |
|               | R: CAGCGGAACCGCTCATTGCCAATGG | 70.1                  | Fisher |         |
| <i>RUNX2</i>  | F: TGGTTACTGTCATGGCGGGTA     | 62.9                  | Thermo | Human   |
|               | R: TCTCAGATCGTTGAACCTTGCTA   | 61.1                  | Fisher |         |
| <i>OPN</i>    | F: CTCCATTGACTCGAACGACTC     | 60.2                  | Thermo | Human   |
|               | R: CAGGTCTGCGAACTTCTTAGAT    | 60.0                  | Fisher |         |
| <i>OCN</i>    | F: CACTCCTCGCCCTATTGGC       | 62.2                  | Thermo | Human   |
|               | R: CCCTCCTGCTTGGACACAAAG     | 62.9                  | Fisher |         |
| <i>COL1A2</i> | F: GAGGGCCAAGACGAAGACATC     | 55.0                  | Thermo | Human   |
|               | R: CAGATCACGTCATCGCACAAC     | 53.8                  | Fisher |         |
| <i>CASP3</i>  | F: CATGGAAGCGAATCAATGGACT    | 60.7                  | Thermo | Human   |
|               | R: CTGTACCAGACCGAGATGTCA     | 60.6                  | Fisher |         |
| <i>CASP8</i>  | F: AGAGTCTGTGCCCAAATCAAC     | 51.3                  | Thermo | Human   |
|               | R: GCTGCTTCTCTCTTTGCTGAA     | 52.6                  | Fisher |         |
| <i>CASP9</i>  | F: CTGTCTACGGCACAGATGGAT     | 61.3                  | Thermo | Human   |
|               | R: GGGACTCGTCTTCAGGGGAA      | 62.8                  | Fisher |         |
| <i>BAX</i>    | F: CCCGAGAGGTCTTTTTCCGAG     | 62.1                  | Thermo | Human   |
|               | R: CCAGCCCATGATGGTTCTGAT     | 61.9                  | Fisher |         |
| <i>BCL2</i>   | F: GGTGGGGTCATGTGTGTGG       | 62.6                  | Thermo | Human   |
|               | R: CGGTTTCAGGTA CT CAGTCATCC | 61.8                  | Fisher |         |
| <i>SOX9</i>   | F: AGCGAACGCACATCAAGAC       | 50.9                  | Thermo | Human   |
|               | R: CTGTAGGCGATCTGTTGGGG      | 54.4                  | Fisher |         |
| <i>ACAN</i>   | F: ACTCTGGGTTTTTCGTGACTCT    | 49.5                  | Thermo | Human   |
|               | R: AACTCAGCGAGTTGTCATGG      | 52.5                  | Fisher |         |
| <i>COL2A1</i> | F: TGGACGATCAGGCGAAACC       | 55.6                  | Thermo | Human   |
|               | R: GCTGCGGATGCTCTCAATCT      | 54.4                  | Fisher |         |



**Table S5. List of antibodies used in this study.**

| Name                                | Source | Cat.NO   | Species |
|-------------------------------------|--------|----------|---------|
| Anti-GAPDH                          | Abcam  | ab8245   | Mouse   |
| Anti-CASPASE-3                      | Abcam  | ab184787 | Rabbit  |
| Anti-B-ACTIN                        | Abcam  | Ab115777 | Mouse   |
| Anti-SOX9                           | Abcam  | ab185966 | Rabbit  |
| Anti-AKT1(phospho S473)             | Abcam  | ab81283  | Rabbit  |
| Anti-AKT3+AKT2+AKT1                 | Abcam  | ab32505  | Rabbit  |
| Anti-COL2A1                         | Abcam  | Ab34712  | Rabbit  |
| Anti-COL1A2                         | Abcam  | AB308455 | Rabbit  |
| Anti-COL10A1                        | Abcam  | AB182563 | Rabbit  |
| Anti-PI3KCA                         | CST    | 4249S    | Rabbit  |
| Anti-BAX                            | Abcam  | Ab32503  | Rabbit  |
| Anti-BCL2                           | Abcam  | Ab182858 | Rabbit  |
| Anti-INTEGRIN-B1                    | CST    | 4706     | Rabbit  |
| Anti-ERK1/2                         | CST    | 4695     | Rabbit  |
| Anti-ERK1/2(phosphor Thr202/Tyr204) | CST    | 4370     | Rabbit  |
