# Supplementary material for: Engineered MgO nanoparticles for cartilage-bone synergistic therapy
Source: PubMed Central journal article supplement — Sci Adv. 2024 Mar 8;10(10):eadk6084. doi: 10.1126/sciadv.adk6084 (PMC10923500; doi:10.1126/sciadv.adk6084), 2024-03-08
Supplement: sciadv.adk6084_sm.v2.pdf [file sciadv.adk6084_sm.v2.pdf]

Supplementary Materials for  
**Engineered MgO nanoparticles for cartilage-bone synergistic  
therapy**

Liming Zheng *et al.*

Corresponding author: Yifeng Zhang, zhangyf3@shanghaitech.edu.cn; Hui Wei,  
weihui@nju.edu.cn; Qing Jiang, qingj@nju.edu.cn

*Sci. Adv.* **10**, eadk6084 (2024)  
DOI: 10.1126/sciadv.adk6084

**This PDF file includes:**

Figs. S1 to S11  
Tables S1 to S5

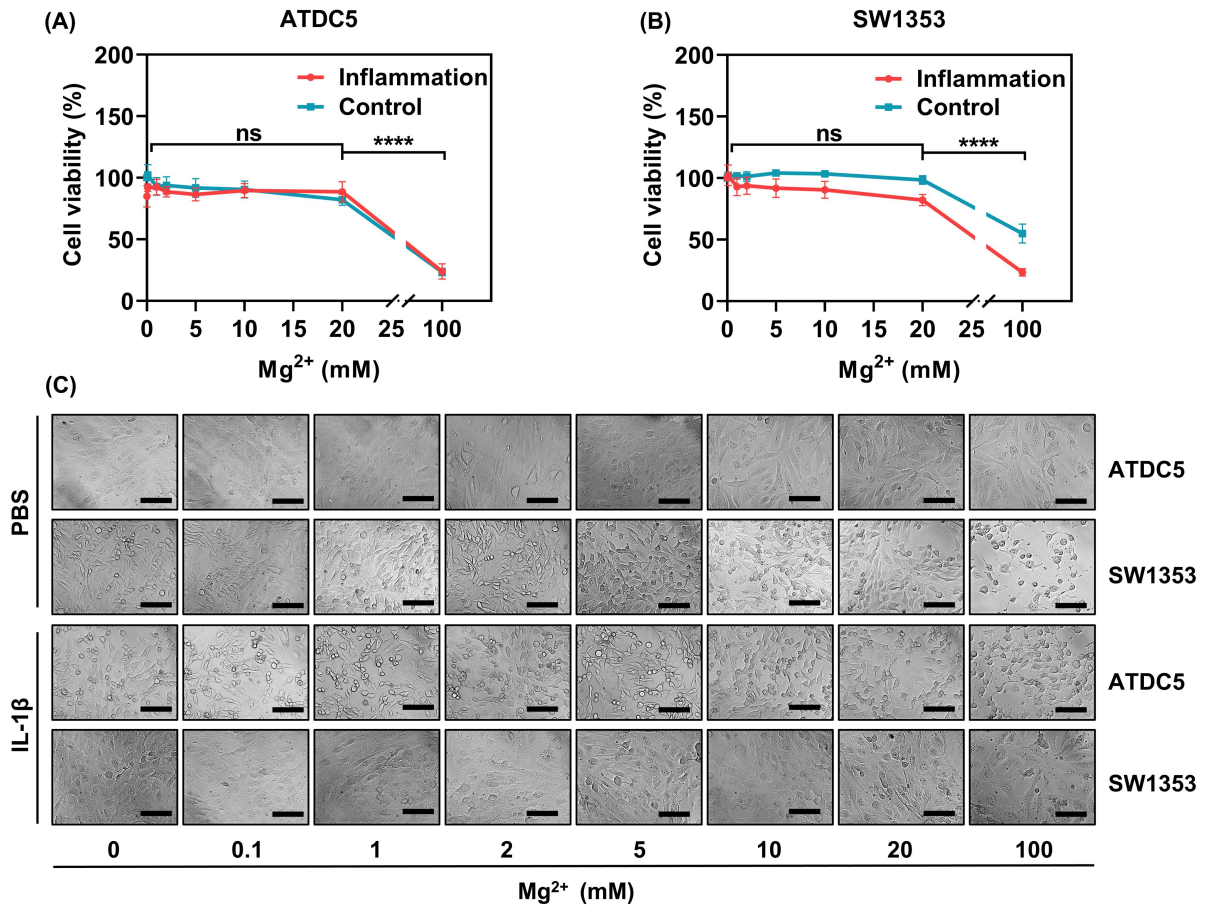

**Fig. S1. Cell viability of Mg<sup>2+</sup> in different kinds of cell lines.**

Cell viability of ATDC5 (A) and SW1353 (B) cells after treatment with gradient concentrations of Mg<sup>2+</sup> with/without inflammatory stimulation. (C) Representative microscopy images of ATDC5 and SW1353 cells after treatment with gradient concentrations of Mg<sup>2+</sup> with/without inflammatory stimulation.

Notes: Scale Bar: 100 μm. All data are the mean ± s.d. Statistical differences between groups were determined by one-way ANOVA analysis. \*\*\*\*P<0.0001, ns P>0.05. n=3.

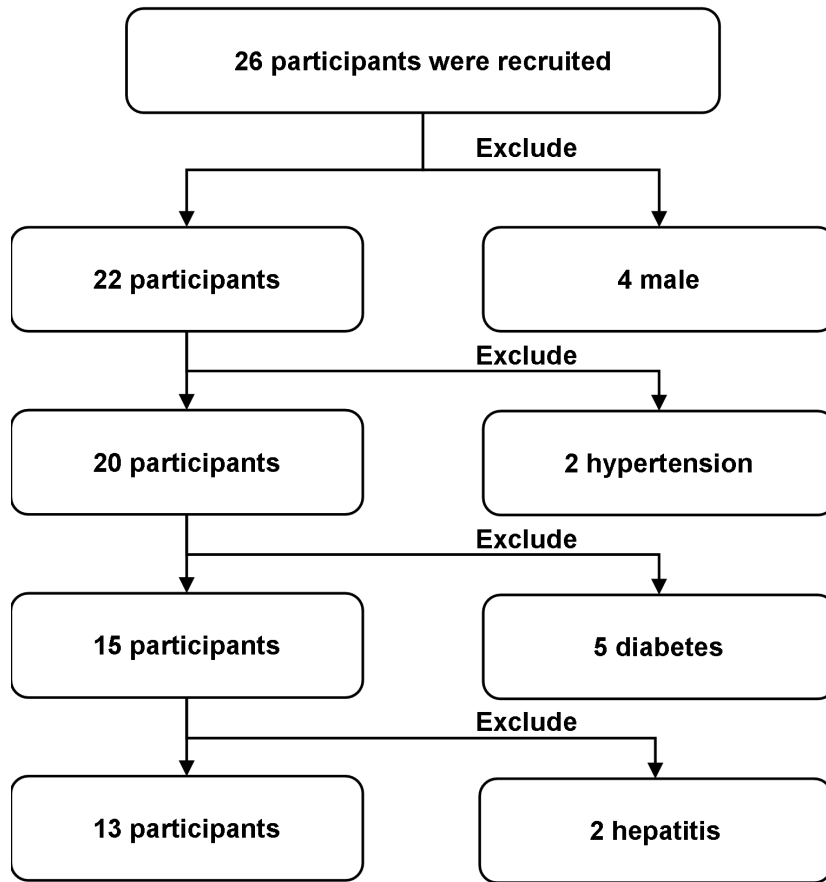

**Fig. S2. Flow chart of the inclusion and exclusion criteria.**

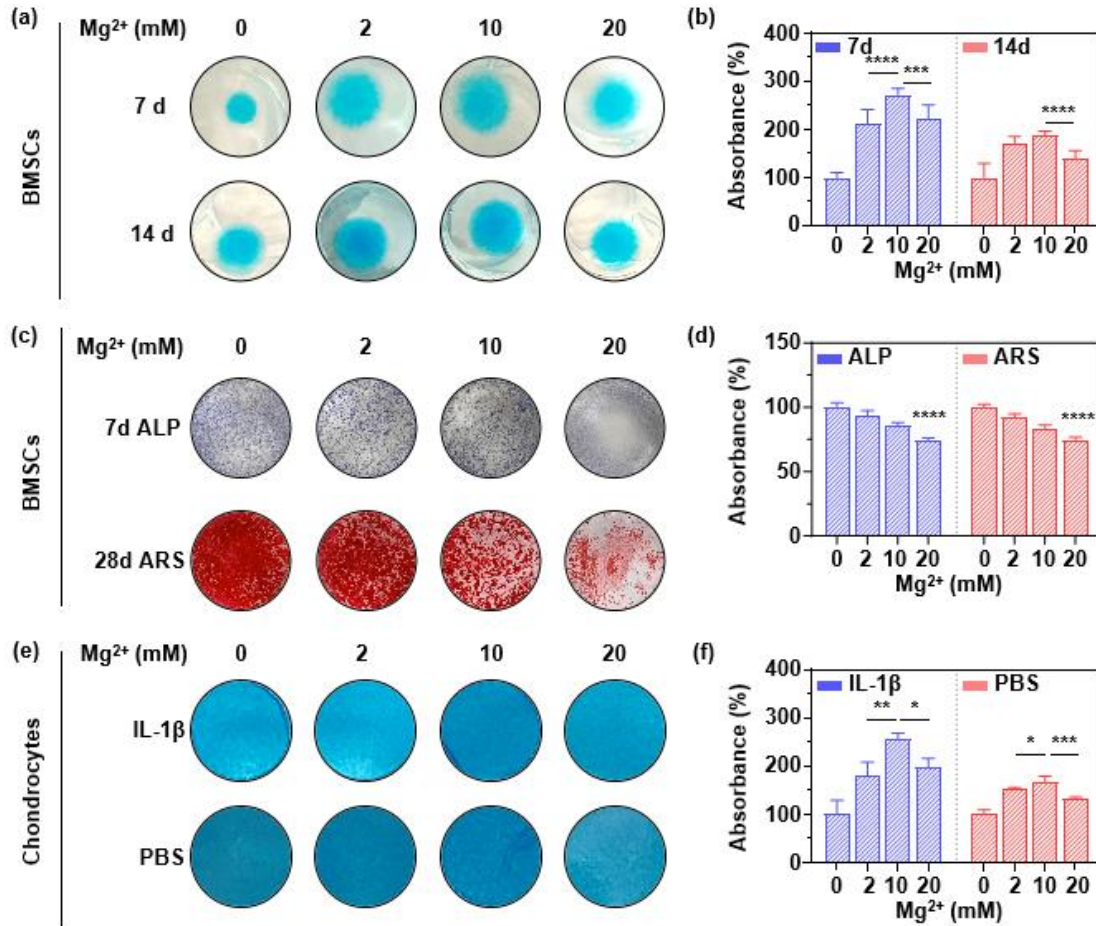

**Fig. S3. Gradient Mg<sup>2+</sup> regulated chondrogenic and osteogenic differentiation of BMSCs and protected inflammatory damaged chondrocytes *in vitro*.**

Alcian blue staining of BMSCs treated with gradient Mg<sup>2+</sup> (A) and quantitative results (B). ALP and ARS staining of BMSCs treated with gradient Mg<sup>2+</sup> (C) and quantitative results (D). Alcian blue staining of chondrocytes treated with gradient Mg<sup>2+</sup> with/without supplementation with 10 ng/mL IL-1β (E) and quantitative results (F).

Notes: All data are the mean ± s.d. Statistical differences between groups were determined by one-way ANOVA analysis. \*P<0.05, \*\*P<0.01, \*\*\*P<0.001, \*\*\*\*P<0.0001. n=3.

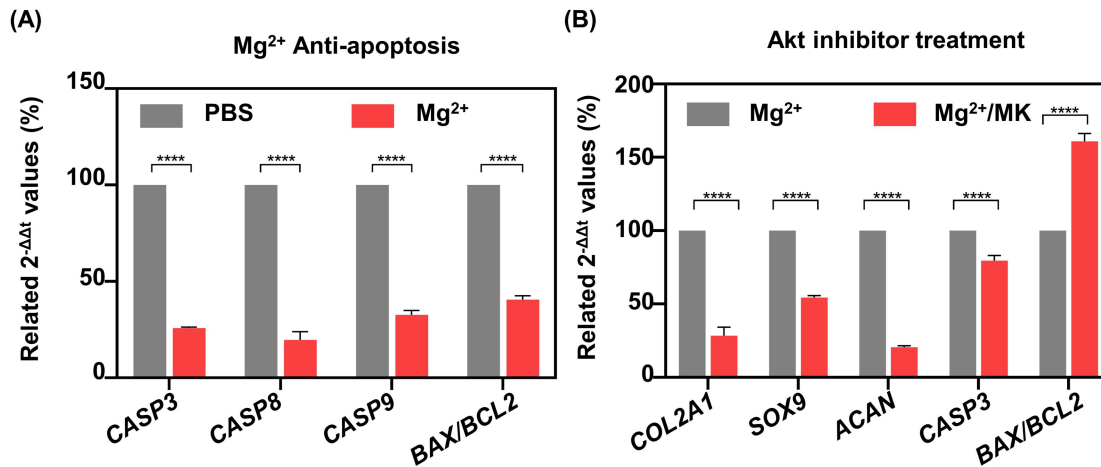

**Fig. S4. Mg<sup>2+</sup> inhibited apoptosis of chondrocytes via phosphorylation of Akt.**

(A) Relative mRNA levels of apoptosis-related genes (*CASP3*, *CASP8*, *CASP9*, and *BAX/BCL2*) in SW1353 cells after treatment with 10 mM Mg<sup>2+</sup> for 24 hours. (B) Relative mRNA levels (*COL2A1*, *SOX9*, *ACAN*, *CASP3*, *BAX/BCL2*) of apoptosis-related genes in SW1353 cells after treatment with 10 mM Mg<sup>2+</sup> and MK2206 for 24 hours.

Notes: All data are the mean  $\pm$  s.d. Statistical differences between groups were determined by t test. \*\*\*\*P<0.0001. n = 4.

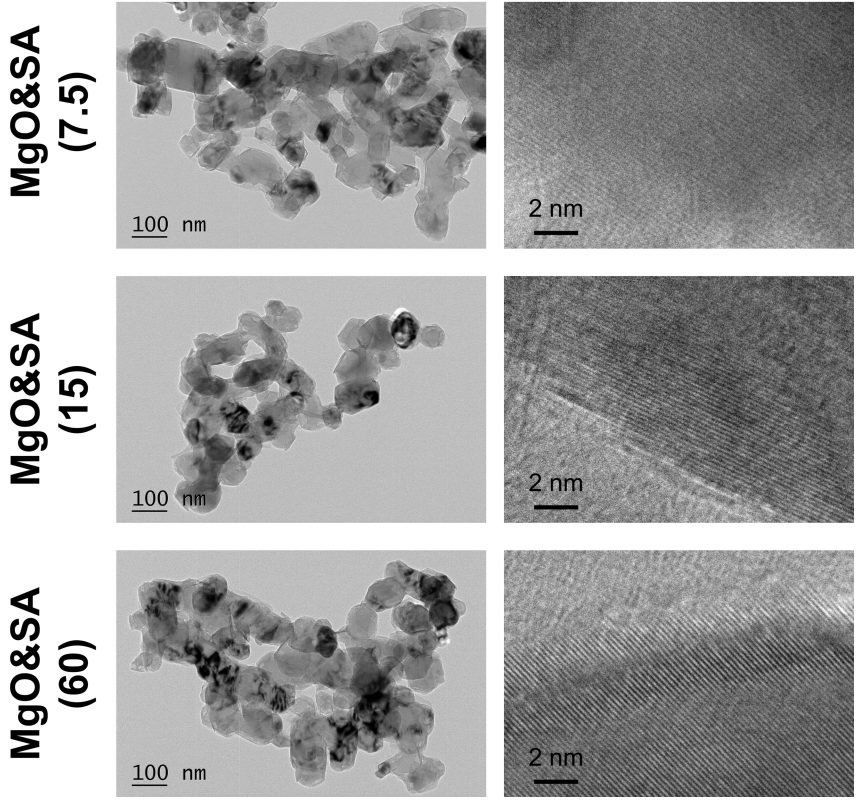

Fig. S5. TEM images of MgO nanoparticles modified with different concentrations of SA.

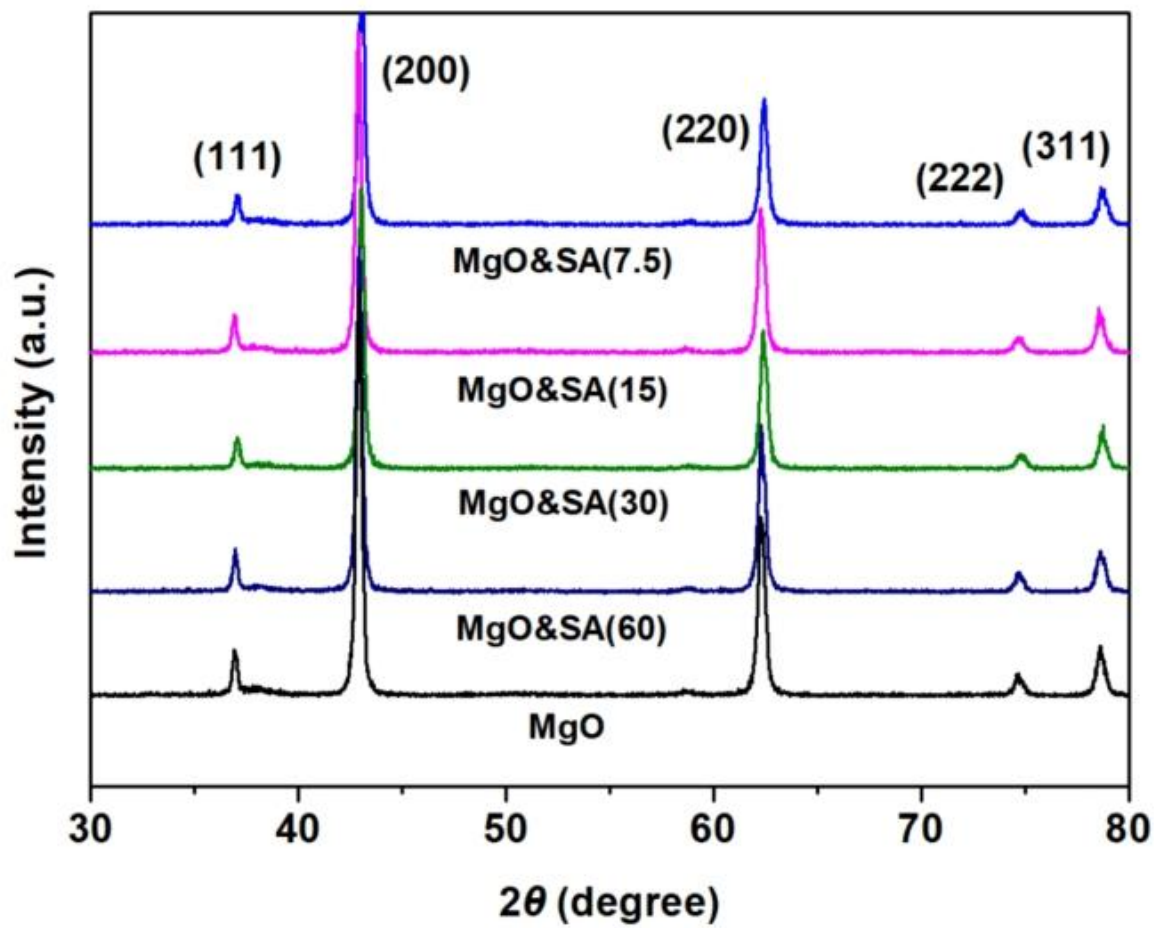

Fig. S6. XRD patterns of MgO nanoparticles modified with different concentrations of SA.

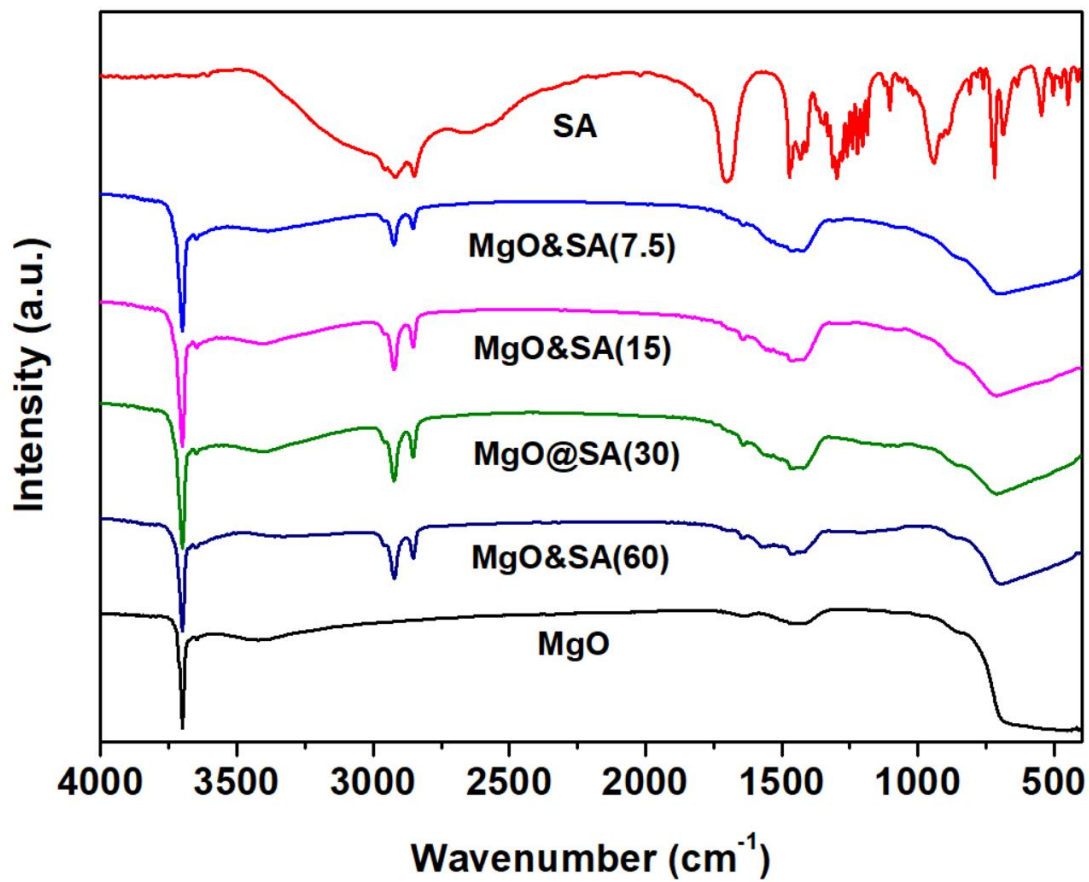

Fig. S7. FTIR spectra of MgO nanoparticles modified with different concentrations of SA.



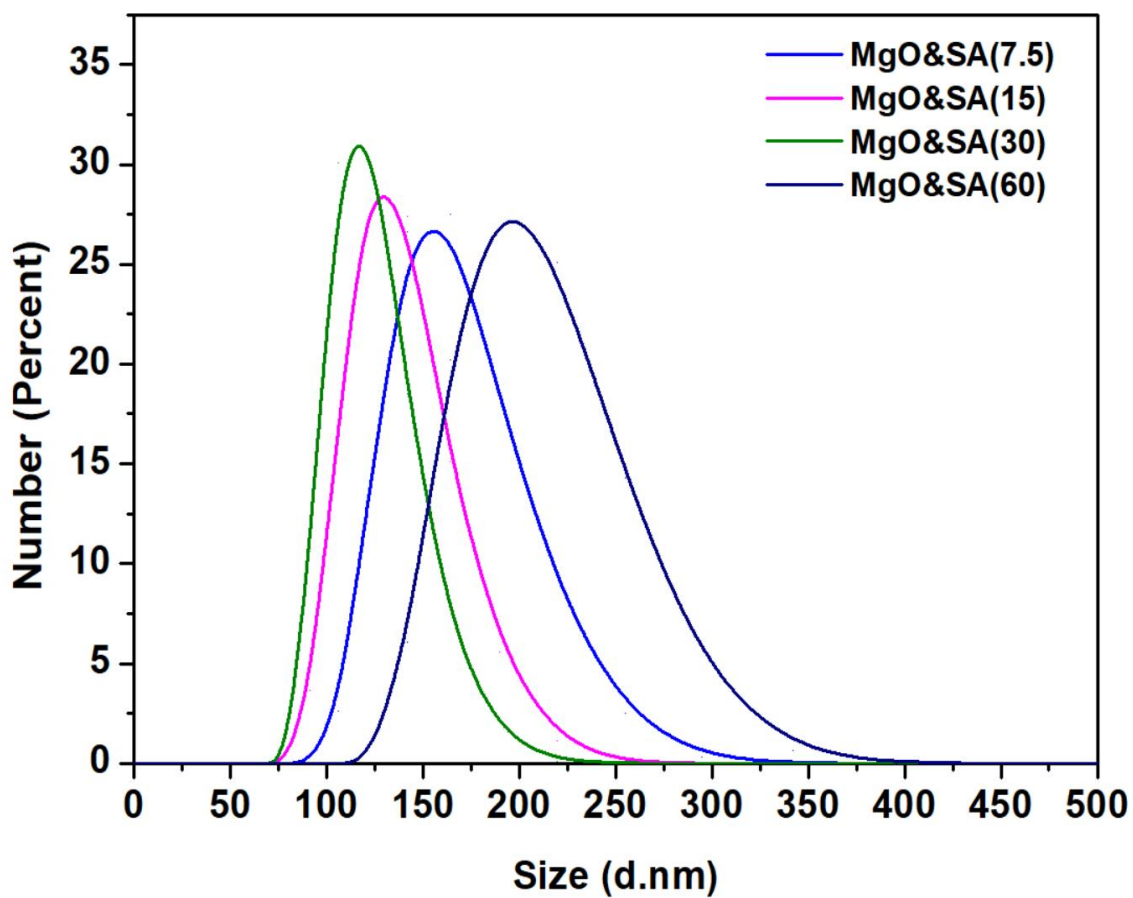

**Fig. S8.** DLS results of MgO nanoparticles modified with different concentrations of SA in DCM.

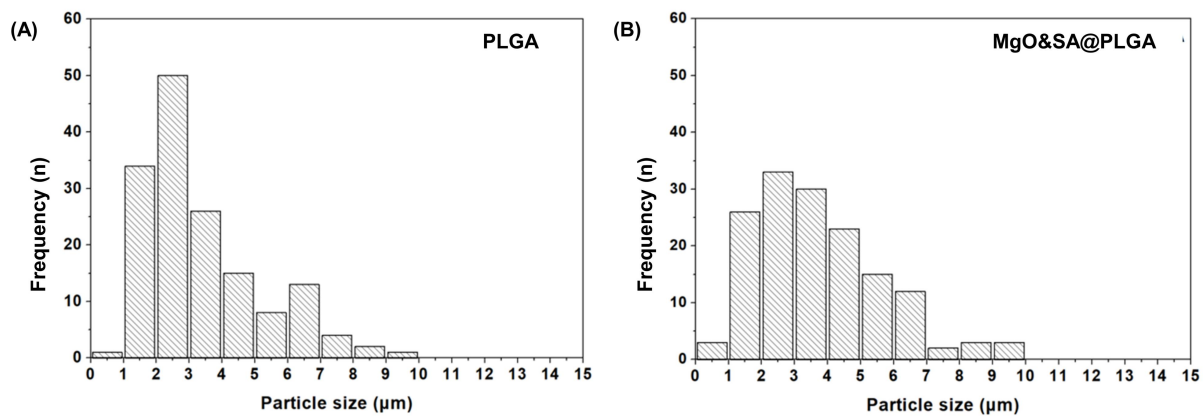

**Fig. S9.** Size distribution of PLGA (A) and MgO&SA@PLGA microspheres (B).

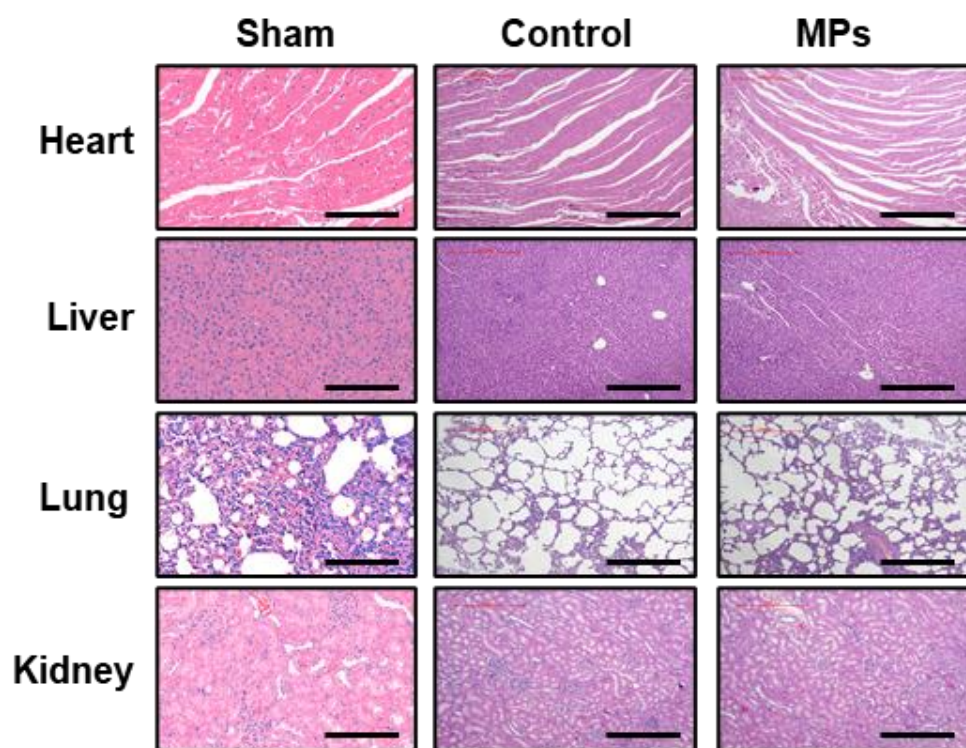

**Fig. S10. Mg<sup>2+</sup>-releasing MPs showed no toxicity *in vivo*.**

H&E staining of sections of heart, liver, kidney, and lung of rats conditionally treated for 4 weeks.

Scale bar: 100  $\mu$ m.

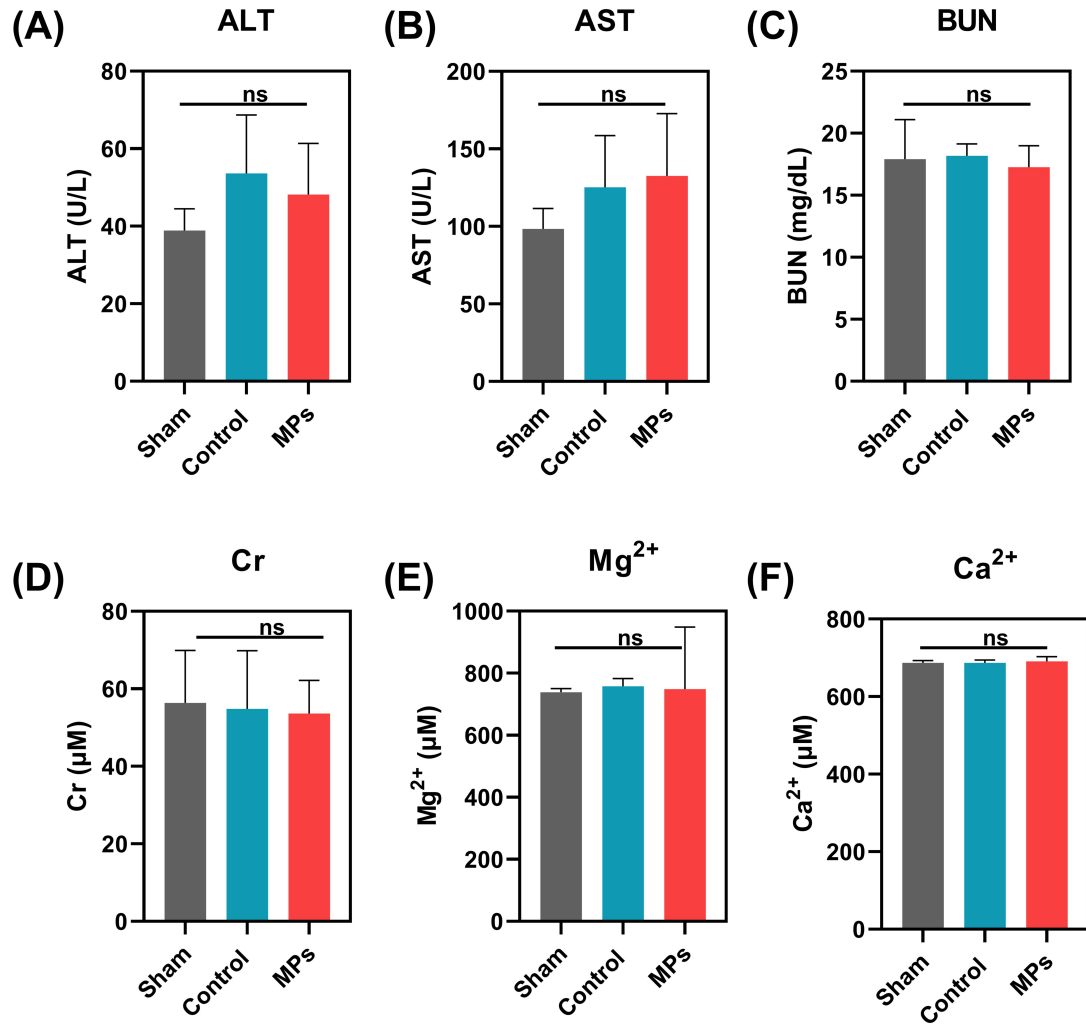

**Fig. S11. Mg<sup>2+</sup>-releasing MPs showed no toxicity *in vivo*.**

Serum indexes, including ALT (A), AST (B), BUN (C), Cr (D), Mg<sup>2+</sup> (E), and Ca<sup>2+</sup> (F), were tested.

**Note:** All data are the mean ± s.d. Statistical differences between groups were determined by one-way ANOVA analysis. ns, P>0.05. n=6.



**Table S2. Bone morphological parameters of subchondral bone at 2 and 4 weeks after the OA model was established.**

| Indexes                     | Sham          | Control      | MPs           | P-value       |
|-----------------------------|---------------|--------------|---------------|---------------|
| BMC (mg/cm <sup>3</sup> )   | 571.3 ± 149.1 | 421.1 ± 35.7 | 512.4 ± 39.0  | <b>0.0048</b> |
| BMD (mg/cm <sup>3</sup> )   | 929.1 ± 37.3  | 953.1 ± 18.7 | 957.2 ± 21.9  | 0.7596        |
| BV/TV (A.U.)                | 0.61 ± 0.19   | 0.43 ± 0.05  | 0.53 ± 0.05   | <b>0.0099</b> |
| BS/BV (1/mm)                | 14.78 ± 4.79  | 19.32 ± 1.95 | 16.50 ± 1.75  | <b>0.0423</b> |
| Conn.D (1/mm <sup>3</sup> ) | 84.46 ± 29.21 | 80.92 ± 20.8 | 93.44 ± 14.89 | 0.3054        |
| SMI (A.U.)                  | -3.41 ± 3.89  | -0.38 ± 0.58 | -1.16 ± 0.78  | 0.1113        |
| Tb.N (1/mm)                 | 4.05 ± 0.40   | 3.96 ± 0.36  | 4.20 ± 0.36   | 0.3258        |
| Tb.Th (µm)                  | 0.15 ± 0.06   | 0.10 ± 0.01  | 0.12 ± 0.01   | <b>0.0344</b> |
| Tb.Sp (µm)                  | 0.10 ± 0.05   | 0.15 ± 0.02  | 0.12 ± 0.02   | <b>0.0267</b> |

Note: P value showed the difference between Control and MPs groups and the P value was bold when P < 0.05. A.U. Arbitrary Units.

**Table S3. Culture medium used to induce differentiation and indexes evaluated in different cells.**

| Cells                                   | Medium for differentiation                                                                                  | Indexes evaluated                                                                                 |
|-----------------------------------------|-------------------------------------------------------------------------------------------------------------|---------------------------------------------------------------------------------------------------|
| ATDC5                                   | BM + ITS                                                                                                    | Expression of Sox9 and Col2 $\alpha$ 1 separately at 7 and 14 days.                               |
| BMSCs<br>(chondrogenic differentiation) | BM + Insulin (6.25 $\mu$ g/mL) + TGF- $\beta$ 1 (10 ng/mL) + ascorbic acid (50 $\mu$ g/mL)                  | Alcian blue staining at 7 and 14 days.                                                            |
| hBMSCs<br>(osteogenic differentiation)  | BM + $\beta$ -sodium glycerophosphate (10 mM) + dexamethasone (0.1 $\mu$ M) + ascorbic acid (50 $\mu$ g/mL) | ALP and ARS staining at 7 and 28 days. Expression of osteogenic related genes at specific period. |
| Mice monocytes                          | BM + MCSF (30 ng/mL) + RANKL (50 ng/mL)                                                                     | The number and area of osteoclasts at 7 days.                                                     |

**Table S4. List of sequences of primers used in this study.**

| Gene          | Primer sequences (5'-3')     | Annealing temperature | Source | Species |
|---------------|------------------------------|-----------------------|--------|---------|
| <i>ACTB</i>   | F: TCACCCACACTGTGCCCATCTACGA | 64.1                  | Thermo | Human   |
|               | R: CAGCGGAACCGCTCATTGCCAATGG | 70.1                  | Fisher |         |
| <i>RUNX2</i>  | F: TGGTTACTGTCATGGCGGGTA     | 62.9                  | Thermo | Human   |
|               | R: TCTCAGATCGTTGAACCTTGCTA   | 61.1                  | Fisher |         |
| <i>OPN</i>    | F: CTCCATTGACTCGAACGACTC     | 60.2                  | Thermo | Human   |
|               | R: CAGGTCTGCGAACTTCTTAGAT    | 60.0                  | Fisher |         |
| <i>OCN</i>    | F: CACTCCTCGCCCTATTGGC       | 62.2                  | Thermo | Human   |
|               | R: CCCTCCTGCTTGGACACAAAG     | 62.9                  | Fisher |         |
| <i>COL1A2</i> | F: GAGGGCCAAGACGAAGACATC     | 55.0                  | Thermo | Human   |
|               | R: CAGATCACGTCATCGCACAAAC    | 53.8                  | Fisher |         |
| <i>CASP3</i>  | F: CATGGAAGCGAATCAATGGACT    | 60.7                  | Thermo | Human   |
|               | R: CTGTACCAGACCGAGATGTCA     | 60.6                  | Fisher |         |
| <i>CASP8</i>  | F: AGAGTCTGTGCCCAAATCAAC     | 51.3                  | Thermo | Human   |
|               | R: GCTGCTTCTCTTTGCTGAA       | 52.6                  | Fisher |         |
| <i>CASP9</i>  | F: CTGTCTACGGCACAGATGGAT     | 61.3                  | Thermo | Human   |
|               | R: GGGACTCGTCTTCAGGGGAA      | 62.8                  | Fisher |         |
| <i>BAX</i>    | F: CCCGAGAGGTCTTTTCCGAG      | 62.1                  | Thermo | Human   |
|               | R: CCAGCCCATGATGGTTCTGAT     | 61.9                  | Fisher |         |
| <i>BCL2</i>   | F: GGTGGGGTCATGTGTGTGG       | 62.6                  | Thermo | Human   |
|               | R: CGGTTCAGGTA CT CAGTCATCC  | 61.8                  | Fisher |         |
| <i>SOX9</i>   | F: AGCGAACGCACATCAAGAC       | 50.9                  | Thermo | Human   |
|               | R: CTGTAGGCGATCTGTTGGGG      | 54.4                  | Fisher |         |
| <i>ACAN</i>   | F: ACTCTGGGTTTTCGTGACTCT     | 49.5                  | Thermo | Human   |
|               | R: ACACTCAGCGAGTTGTCATGG     | 52.5                  | Fisher |         |
| <i>COL2A1</i> | F: TGGACGATCAGGCGAAACC       | 55.6                  | Thermo | Human   |
|               | R: GCTGCGGATGCTCTCAATCT      | 54.4                  | Fisher |         |



**Table S5. List of antibodies used in this study.**

| Name                                | Source | Cat.NO   | Species |
|-------------------------------------|--------|----------|---------|
| Anti-GAPDH                          | Abcam  | ab8245   | Mouse   |
| Anti-CASPASE-3                      | Abcam  | ab184787 | Rabbit  |
| Anti-B-ACTIN                        | Abcam  | Ab115777 | Mouse   |
| Anti-SOX9                           | Abcam  | ab185966 | Rabbit  |
| Anti-AKT1(phospho S473)             | Abcam  | ab81283  | Rabbit  |
| Anti-AKT3+AKT2+AKT1                 | Abcam  | ab32505  | Rabbit  |
| Anti-COL2A1                         | Abcam  | Ab34712  | Rabbit  |
| Anti-COL1A2                         | Abcam  | AB308455 | Rabbit  |
| Anti-COL10A1                        | Abcam  | AB182563 | Rabbit  |
| Anti-PI3KCA                         | CST    | 4249S    | Rabbit  |
| Anti-BAX                            | Abcam  | Ab32503  | Rabbit  |
| Anti-BCL2                           | Abcam  | Ab182858 | Rabbit  |
| Anti-INTEGRIN-B1                    | CST    | 4706     | Rabbit  |
| Anti-ERK1/2                         | CST    | 4695     | Rabbit  |
| Anti-ERK1/2(phosphor Thr202/Tyr204) | CST    | 4370     | Rabbit  |
